# Supplementary material for: Theoretical Insight into the Spectral Characteristics of Fe(II)-Based Complexes for Dye-Sensitized Solar Cells—Part I: Polypyridyl Ancillary Ligands
Source: Hindawi journal article supplement (doi:10.1155/2011/316952), 2011-01-01
Supplement: f1 [file 316952.f1.docx]

[**Supplementary Materials**](http://mts.hindawi.com/author/316952/supp.3.pdf)

**Theoretical Insight into the Spectral Characteristics of Fe(II)-based Complexes for Dye-Sensitized Solar Cells. Part I: Polypyridyl Ancillary Ligands**

Xiaoqing Lua, Shuxian Weib, Chi-Man Lawrence Wua*, Ning Dinga, Shaoren Lib, Lianming Zhaob, Wenyue Guob*

*aDepartment of Physics and Materials Science, City University of Hong Kong, Hong Kong SAR, People’s Republic of China*

*bCollege of Physics Science and Technology, China University of Petroleum, Dongying, Shandong 257061, People’s Republic of China*

##### (Correspondence should be addressed to lawrence.wu@cityu.edu.hk, wyguo@upc.edu.cn)

Figure S1: The calculated absorption spectra of Fe(II)-based complex **1** using the B3LYP and CAM-B3LYP funtionals with 6-31G* basis set in both the gas phase and MeCN solution.

Figure S2: Simulated absorption spectra of Fe(II)-based complexes and **N3** in both the gas phase and MeCN solution.

Table S1: Excitation energies (E, nm), oscillator strength (f), and relative orbital contributions of the absorption spectra of **1'**, **2**, **3** and **5** calculated at the B3LYP/6-31G* level in MeCN solution.

| E | f | Compositions |
| --- | --- | --- |
| **1'** | | |
| 630.8  603.6  471.6  456.5  445.0  382.8  358.2 | 0.063  0.024  0.041  0.024  0.024  0.136  0.028 | H-1→L+0 (57%)  H-1→L+0 (39%) H-0→L+9 (35%)  H-0→L+2 (91%)  H-1→L+2 (80%)  H-3→L+0 (96%)  H-6→L+0 (95%)  H-4→L+3 (90%) |
| **2** | | |
| 645.1  606.4  571.7  456.6  455.1  438.2  424.9  403.7  364.8 | 0.025  0.027  0.053  0.070  0.046  0.023  0.025  0.069  0.026 | H-0→L+0 (89%)  H-1→L+1 (80%)  H-2→L+0 (88%)  H-0→L+3 (76%)  H-0→L+2 (59%)  H-1→L+2 (84%)  H-2→L+3 (93%)  H-5→L+1 (63%)  H-2→L+9 (30%) H-6→L+0 (26%) |
| **3** | | |
| 473.6  473.6  445.5  445.1  376.1  355.9  355.9 | 0.049  0.048  0.098  0.097  0.021  0.105  0.110 | H-1→L+0 (28%) H-2→L+1 (27%)  H-2→L+0 (27%) H-1→L+1 (26%)  H-1→L+2 (91%)  H-2→L+2 (93%)  H-1→L+3 (27%)  H-0→L+4 (65%)  H-0→L+5 (76%) |
| **5** | | |
| 543.1  542.9  474.5  436.2  436.2  410.9  397.6  397.5 | 0.020  0.020  0.129  0.019  0.018  0.085  0.016  0.017 | H-0→L+0 (89%)  H-0→L+1 (89%)  H-1→L+0 (46%) H-2→L+1 (45%)  H-1→L+2 (73%)  H-2→L+2 (73%)  H-0→L+3 (95%)  H-1→L+3 (97%)  H-2→L+3 (97%) |
